# Supplementary material for: The impact of SARS-CoV-2 3CL protease mutations on nirmatrelvir inhibitory efficiency. Computational insights into potential resistance mechanisms
Source: Royal Society of Chemistry journal article supplement (doi:10.1039/d2sc06584c), 2023-01-01
Supplement: d2sc06584c1.pdf [file d2sc06584c1.pdf]

## Supplementary Information

### Impact of SARS-CoV-2 3CL Protease Mutations on Nirmatrelvir Inhibitory Efficiency. Computational Insights into Potential Resistance Mechanisms

Carlos A. Ramos-Guzmán<sup>a,b</sup>, Milorad Andjelkovic<sup>a</sup>, Kirill Zinovjev<sup>a</sup>, J. Javier Ruiz-  
Pernía<sup>a\*</sup>, Iñaki Tuñón<sup>a\*</sup>

<sup>a</sup>Departamento de Química Física, Universidad de Valencia, 46100 Burjassot (Spain)

<sup>b</sup>Instituto de Materiales Avanzados, Universidad Jaume I, 12071 Castelló (Spain)

To whom correspondence should be addressed:

[ignacio.tunon@uv.es](mailto:ignacio.tunon@uv.es)

[j.javier.ruiz@uv.es](mailto:j.javier.ruiz@uv.es)

**Table S1.** Contribution of each residue to the MMGBSA binding free energy of nirmaltrelvir ( $g_I$ ) and the natural substrate ( $g_S$ ) in the active site of wild type 3CLpro. Side-chain only contributions are also provided ( $g_{I,sc}$  and  $g_{S,sc}$ ) Values are given in kcal·mol<sup>-1</sup>. The standard deviation is given in parenthesis.

| Residue | $g_I$          | $g_{I,sc}$     | $g_S$          | $g_{S,sc}$     |
|---------|----------------|----------------|----------------|----------------|
| S1      | 3.47 (0.1443)  | 0.15 (0.0119)  | 2.56 (0.0962)  | 0.02 (0.0752)  |
| G2      | -0.11 (0.0063) | -0.01 (0.0010) | -0.08 (0.0142) | -0.00 (0.0018) |
| F3      | -0.02 (0.0019) | -0.02 (0.0008) | -0.02 (0.0017) | -0.03 (0.0009) |
| R4      | -0.50 (0.0108) | -0.43 (0.0084) | -0.86 (0.0358) | -0.55 (0.0411) |
| K5      | -0.31 (0.0075) | -0.25 (0.0060) | -0.66 (0.0307) | -0.38 (0.0345) |
| M6      | -0.01 (0.0013) | -0.01 (0.0009) | -0.01 (0.0011) | -0.02 (0.0013) |
| A7      | 0.01 (0.0004)  | -0.02 (0.0002) | 0.02 (0.0032)  | -0.02 (0.0015) |
| F8      | 0.01 (0.0006)  | -0.01 (0.0002) | 0.02 (0.0018)  | -0.01 (0.0008) |
| P9      | -0.01 (0.0003) | -0.10 (0.0009) | -0.02 (0.0018) | -0.10 (0.0090) |
| S10     | -0.00 (0.0001) | -0.02 (0.0003) | -0.00 (0.0004) | -0.01 (0.0011) |
| G11     | -0.01 (0.0002) | 0.01 (0.0001)  | -0.01 (0.0016) | 0.01 (0.0009)  |
| K12     | -0.43 (0.0037) | -0.32 (0.0028) | -0.41 (0.0318) | -0.22 (0.0252) |
| V13     | -0.00 (0.0002) | -0.01 (0.0002) | -0.01 (0.0011) | -0.01 (0.0009) |
| E14     | 0.53 (0.0049)  | 0.45 (0.0044)  | 0.57 (0.0388)  | 0.38 (0.0328)  |
| G15     | -0.01 (0.0002) | 0.01 (0.0001)  | -0.01 (0.0007) | 0.01 (0.0007)  |
| C16     | -0.01 (0.0003) | -0.01 (0.0001) | -0.03 (0.0010) | -0.01 (0.0007) |
| M17     | -0.03 (0.0024) | -0.03 (0.0022) | -0.01 (0.0041) | -0.04 (0.0029) |
| V18     | 0.05 (0.0009)  | -0.01 (0.0001) | 0.06 (0.0072)  | -0.00 (0.0004) |
| Q19     | -0.06 (0.0032) | -0.04 (0.0035) | 0.03 (0.0259)  | 0.04 (0.0245)  |
| V20     | 0.06 (0.0015)  | -0.02 (0.0003) | -0.10 (0.0102) | -0.02 (0.0020) |
| T21     | -0.01 (0.0052) | -0.01 (0.0065) | -0.04 (0.0231) | -0.16 (0.0177) |
| C22     | -0.02 (0.0018) | -0.01 (0.0009) | -0.03 (0.0169) | -0.02 (0.0040) |
| G23     | 0.03 (0.0013)  | 0.00 (0.0003)  | -0.07 (0.0196) | -0.02 (0.0091) |
| T24     | 0.03 (0.0016)  | -0.01 (0.0021) | -1.85 (0.2788) | -1.29 (0.2037) |
| T25     | -0.14 (0.0126) | -0.07 (0.0133) | -3.53 (0.5208) | -2.81 (0.3626) |
| T26     | 0.21 (0.0075)  | -0.04 (0.0063) | -5.84 (0.7846) | -2.21 (0.1831) |
| L27     | -0.79 (0.0063) | -0.64 (0.0057) | -2.28 (0.1128) | -1.67 (0.0330) |
| N28     | -0.29 (0.0061) | -0.26 (0.0060) | -0.54 (0.0425) | -0.32 (0.0249) |
| G29     | 0.04 (0.0006)  | 0.01 (0.0003)  | 0.04 (0.0030)  | -0.01 (0.0014) |
| L30     | -0.01 (0.0002) | -0.02 (0.0003) | -0.03 (0.0009) | -0.02 (0.0009) |
| W31     | 0.01 (0.0002)  | 0.00 (0.0000)  | 0.01 (0.0008)  | -0.01 (0.0008) |
| L32     | -0.01 (0.0001) | -0.01 (0.0001) | -0.01 (0.0005) | -0.00 (0.0006) |
| D33     | 0.23 (0.0034)  | 0.18 (0.0026)  | 0.08 (0.0177)  | 0.04 (0.0101)  |
| D34     | 0.17 (0.0033)  | 0.13 (0.0026)  | -0.03 (0.0132) | -0.02 (0.0089) |
| V35     | 0.01 (0.0002)  | -0.00 (0.0001) | 0.04 (0.0014)  | -0.00 (0.0003) |
| V36     | -0.02 (0.0007) | -0.01 (0.0001) | -0.01 (0.0012) | -0.00 (0.0004) |
| Y37     | 0.03 (0.0009)  | -0.02 (0.0002) | 0.04 (0.0025)  | -0.02 (0.0009) |

|     |                |                |                |                |
|-----|----------------|----------------|----------------|----------------|
| C38 | -0.08 (0.0026) | -0.02 (0.0007) | -0.00 (0.0061) | -0.05 (0.0038) |
| P39 | -0.05 (0.0026) | -0.19 (0.0022) | -0.19 (0.0129) | -0.00 (0.0134) |
| R40 | 0.57 (0.0098)  | 0.42 (0.0099)  | 1.12 (0.0215)  | 0.62 (0.0143)  |
| H41 | -2.96 (0.1191) | -2.92 (0.1148) | -6.12 (0.0804) | -6.29 (0.1539) |
| V42 | -0.10 (0.0036) | -0.06 (0.0011) | -0.42 (0.0169) | -0.25 (0.0162) |
| I43 | 0.00 (0.0029)  | -0.01 (0.0006) | -0.00 (0.0032) | -0.04 (0.0038) |
| C44 | -0.05 (0.0164) | -0.14 (0.0169) | -0.19 (0.0266) | -0.20 (0.0134) |
| T45 | 0.01 (0.0071)  | 0.00 (0.0021)  | -0.08 (0.0219) | -0.46 (0.1465) |
| S46 | 0.03 (0.0051)  | 0.01 (0.0014)  | -0.08 (0.0125) | -0.03 (0.0142) |
| E47 | -0.38 (0.0283) | -0.29 (0.0236) | -0.48 (0.0433) | -0.23 (0.0674) |
| D48 | -0.37 (0.0670) | -0.22 (0.0597) | -0.58 (0.1177) | -0.09 (0.1447) |
| M49 | -3.13 (0.2395) | -2.68 (0.2007) | -3.83 (0.0821) | -3.05 (0.1482) |
| L50 | -0.59 (0.1621) | -0.44 (0.1395) | -0.41 (0.0183) | -0.26 (0.0080) |
| N51 | -0.04 (0.0208) | -0.00 (0.0056) | 0.04 (0.0027)  | -0.01 (0.0024) |
| P52 | -0.08 (0.0066) | 0.07 (0.0036)  | -0.07 (0.0044) | 0.12 (0.0075)  |
| N53 | 0.01 (0.0047)  | -0.01 (0.0054) | 0.02 (0.0018)  | 0.00 (0.0025)  |
| Y54 | -0.29 (0.0296) | -0.31 (0.0304) | -0.25 (0.0122) | -0.32 (0.0255) |
| E55 | -0.24 (0.0318) | -0.22 (0.0294) | -0.43 (0.0124) | -0.33 (0.0152) |
| D56 | -0.15 (0.0114) | -0.13 (0.0091) | -0.36 (0.0157) | -0.23 (0.0285) |
| L57 | 0.03 (0.0009)  | 0.00 (0.0003)  | 0.04 (0.0010)  | 0.01 (0.0024)  |
| L58 | 0.01 (0.0012)  | -0.00 (0.0002) | 0.01 (0.0009)  | 0.00 (0.0007)  |
| I59 | 0.01 (0.0003)  | 0.00 (0.0002)  | 0.01 (0.0005)  | 0.00 (0.0008)  |
| R60 | 0.14 (0.0066)  | 0.12 (0.0046)  | 0.48 (0.0245)  | 0.21 (0.0508)  |
| K61 | 0.05 (0.0083)  | 0.05 (0.0067)  | 0.73 (0.0403)  | 0.25 (0.1220)  |
| S62 | 0.00 (0.0004)  | 0.00 (0.0002)  | -0.02 (0.0014) | 0.00 (0.0021)  |
| N63 | 0.01 (0.0003)  | -0.00 (0.0003) | -0.00 (0.0013) | 0.00 (0.0005)  |
| H64 | 0.01 (0.0003)  | 0.01 (0.0002)  | 0.00 (0.0012)  | -0.01 (0.0016) |
| N65 | 0.01 (0.0004)  | -0.01 (0.0002) | 0.01 (0.0019)  | -0.00 (0.0057) |
| F66 | -0.02 (0.0006) | -0.01 (0.0002) | 0.01 (0.0030)  | -0.04 (0.0026) |
| L67 | 0.02 (0.0005)  | -0.01 (0.0002) | -0.04 (0.0026) | -0.02 (0.0040) |
| V68 | -0.02 (0.0002) | -0.01 (0.0001) | -0.00 (0.0022) | -0.01 (0.0005) |
| Q69 | 0.02 (0.0005)  | -0.01 (0.0004) | 0.00 (0.0022)  | 0.01 (0.0059)  |
| A70 | -0.01 (0.0002) | -0.01 (0.0001) | -0.02 (0.0016) | -0.00 (0.0006) |
| G71 | -0.00 (0.0003) | 0.01 (0.0001)  | -0.02 (0.0019) | 0.00 (0.0006)  |
| N72 | -0.00 (0.0002) | 0.00 (0.0001)  | -0.00 (0.0008) | 0.00 (0.0005)  |
| V73 | 0.01 (0.0001)  | -0.00 (0.0001) | 0.01 (0.0016)  | -0.00 (0.0002) |
| Q74 | -0.01 (0.0003) | -0.01 (0.0002) | 0.02 (0.0028)  | 0.01 (0.0013)  |
| L75 | 0.00 (0.0002)  | -0.01 (0.0001) | -0.01 (0.0013) | -0.00 (0.0005) |
| R76 | -0.14 (0.0034) | -0.10 (0.0023) | 0.12 (0.0119)  | 0.02 (0.0197)  |
| V77 | -0.00 (0.0002) | -0.00 (0.0001) | 0.01 (0.0007)  | 0.00 (0.0011)  |
| I78 | -0.01 (0.0001) | -0.00 (0.0001) | -0.01 (0.0007) | 0.00 (0.0004)  |
| G79 | 0.01 (0.0001)  | 0.00 (0.0001)  | 0.01 (0.0007)  | -0.00 (0.0007) |
| H80 | 0.01 (0.0008)  | 0.01 (0.0006)  | 0.03 (0.0008)  | 0.00 (0.0023)  |
| S81 | 0.01 (0.0005)  | -0.00 (0.0001) | -0.01 (0.0010) | 0.00 (0.0008)  |
| M82 | -0.00 (0.0009) | -0.02 (0.0007) | 0.00 (0.0016)  | -0.03 (0.0011) |

|      |                |                |                |                |
|------|----------------|----------------|----------------|----------------|
| Q83  | 0.01 (0.0008)  | 0.00 (0.0005)  | 0.00 (0.0007)  | 0.02 (0.0015)  |
| N84  | -0.01 (0.0020) | -0.01 (0.0009) | -0.02 (0.0025) | -0.00 (0.0010) |
| C85  | -0.06 (0.0030) | -0.03 (0.0013) | -0.09 (0.0023) | -0.01 (0.0005) |
| V86  | -0.04 (0.0010) | -0.02 (0.0003) | -0.01 (0.0015) | -0.02 (0.0005) |
| L87  | 0.01 (0.0005)  | -0.01 (0.0004) | 0.01 (0.0028)  | 0.00 (0.0014)  |
| K88  | -0.12 (0.0059) | -0.08 (0.0040) | 0.14 (0.0166)  | 0.08 (0.0097)  |
| L89  | 0.00 (0.0003)  | -0.01 (0.0002) | 0.01 (0.0011)  | -0.00 (0.0011) |
| K90  | -0.14 (0.0032) | -0.10 (0.0023) | 0.06 (0.0117)  | 0.03 (0.0090)  |
| V91  | -0.01 (0.0001) | -0.01 (0.0001) | 0.00 (0.0007)  | 0.00 (0.0003)  |
| D92  | 0.16 (0.0030)  | 0.14 (0.0025)  | -0.06 (0.0120) | -0.01 (0.0157) |
| T93  | 0.00 (0.0002)  | -0.00 (0.0002) | 0.00 (0.0005)  | 0.00 (0.0005)  |
| A94  | -0.00 (0.0001) | -0.01 (0.0001) | 0.00 (0.0004)  | -0.00 (0.0003) |
| N95  | -0.01 (0.0003) | -0.01 (0.0003) | -0.00 (0.0014) | 0.00 (0.0011)  |
| P96  | -0.00 (0.0001) | -0.05 (0.0005) | -0.00 (0.0004) | -0.01 (0.0020) |
| K97  | -0.34 (0.0031) | -0.28 (0.0025) | -0.21 (0.0224) | -0.14 (0.0151) |
| T98  | -0.00 (0.0001) | -0.00 (0.0001) | -0.00 (0.0004) | -0.00 (0.0002) |
| P99  | -0.01 (0.0001) | -0.06 (0.0007) | -0.02 (0.0011) | -0.04 (0.0042) |
| K100 | -0.23 (0.0026) | -0.18 (0.0021) | -0.16 (0.0184) | -0.08 (0.0152) |
| Y101 | -0.01 (0.0001) | -0.01 (0.0001) | -0.01 (0.0008) | -0.01 (0.0004) |
| K102 | -0.21 (0.0034) | -0.17 (0.0026) | -0.20 (0.0194) | -0.11 (0.0183) |
| F103 | -0.01 (0.0003) | -0.01 (0.0001) | -0.01 (0.0011) | -0.01 (0.0003) |
| V104 | 0.01 (0.0003)  | -0.01 (0.0001) | 0.01 (0.0010)  | -0.01 (0.0005) |
| R105 | -0.13 (0.0092) | -0.08 (0.0074) | -0.01 (0.0237) | 0.10 (0.0206)  |
| I106 | -0.01 (0.0003) | -0.01 (0.0004) | -0.02 (0.0007) | -0.01 (0.0011) |
| Q107 | 0.02 (0.0004)  | -0.00 (0.0002) | 0.03 (0.0010)  | -0.00 (0.0007) |
| P108 | -0.01 (0.0005) | -0.04 (0.0014) | -0.01 (0.0008) | -0.03 (0.0048) |
| G109 | -0.01 (0.0003) | 0.01 (0.0002)  | 0.00 (0.0006)  | 0.01 (0.0008)  |
| Q110 | 0.02 (0.0010)  | -0.00 (0.0011) | 0.02 (0.0016)  | -0.01 (0.0014) |
| T111 | -0.01 (0.0003) | -0.01 (0.0002) | -0.03 (0.0010) | -0.01 (0.0010) |
| F112 | -0.01 (0.0002) | -0.03 (0.0003) | -0.00 (0.0005) | -0.04 (0.0005) |
| S113 | -0.01 (0.0007) | -0.02 (0.0004) | -0.02 (0.0007) | -0.02 (0.0017) |
| V114 | -0.04 (0.0010) | -0.03 (0.0004) | -0.02 (0.0016) | -0.03 (0.0013) |
| L115 | 0.04 (0.0014)  | -0.02 (0.0001) | 0.07 (0.0044)  | -0.01 (0.0011) |
| A116 | -0.10 (0.0007) | -0.05 (0.0004) | -0.15 (0.0083) | -0.06 (0.0029) |
| C117 | 0.09 (0.0008)  | -0.06 (0.0008) | 0.24 (0.0161)  | -0.08 (0.0057) |
| Y118 | -0.26 (0.0054) | -0.21 (0.0065) | -0.42 (0.0706) | -0.37 (0.0431) |
| N119 | -0.07 (0.0197) | 0.06 (0.0147)  | -1.28 (0.3739) | -0.85 (0.2201) |
| G120 | -0.06 (0.0012) | 0.02 (0.0003)  | -0.07 (0.0100) | -0.01 (0.0020) |
| S121 | 0.04 (0.0011)  | -0.02 (0.0003) | 0.08 (0.0065)  | -0.00 (0.0035) |
| P122 | -0.03 (0.0005) | -0.11 (0.0010) | -0.05 (0.0038) | -0.09 (0.0092) |
| S123 | -0.03 (0.0036) | -0.01 (0.0033) | -0.03 (0.0032) | 0.00 (0.0023)  |
| G124 | 0.03 (0.0013)  | 0.02 (0.0002)  | 0.04 (0.0026)  | 0.02 (0.0016)  |
| V125 | -0.01 (0.0003) | -0.01 (0.0001) | 0.00 (0.0006)  | -0.01 (0.0007) |
| Y126 | -0.03 (0.0006) | -0.07 (0.0005) | -0.08 (0.0025) | -0.10 (0.0044) |
| Q127 | 0.03 (0.0010)  | 0.01 (0.0012)  | 0.04 (0.0026)  | 0.00 (0.0019)  |

|      |                 |                |                 |                |
|------|-----------------|----------------|-----------------|----------------|
| C128 | 0.01 (0.0010)   | 0.01 (0.0005)  | 0.00 (0.0010)   | 0.00 (0.0009)  |
| A129 | 0.03 (0.0005)   | -0.01 (0.0002) | 0.04 (0.0010)   | -0.01 (0.0012) |
| M130 | -0.02 (0.0007)  | -0.02 (0.0005) | -0.02 (0.0019)  | -0.03 (0.0017) |
| R131 | -0.26 (0.0089)  | -0.21 (0.0067) | -0.48 (0.0189)  | -0.28 (0.0285) |
| P132 | -0.00 (0.0003)  | -0.04 (0.0015) | -0.02 (0.0005)  | -0.04 (0.0053) |
| N133 | 0.05 (0.0018)   | 0.02 (0.0009)  | -0.00 (0.0041)  | -0.00 (0.0031) |
| F134 | 0.03 (0.0016)   | -0.01 (0.0003) | -0.00 (0.0026)  | -0.01 (0.0005) |
| T135 | -0.04 (0.0031)  | -0.00 (0.0013) | 0.02 (0.0026)   | 0.04 (0.0012)  |
| I136 | 0.02 (0.0013)   | -0.07 (0.0012) | 0.02 (0.0015)   | -0.07 (0.0027) |
| K137 | -0.30 (0.0104)  | -0.12 (0.0077) | -0.62 (0.0213)  | -0.25 (0.0295) |
| G138 | -0.27 (0.0049)  | 0.02 (0.0004)  | -0.26 (0.0047)  | 0.03 (0.0018)  |
| S139 | -0.15 (0.0215)  | -0.00 (0.0102) | -0.05 (0.0144)  | 0.00 (0.0130)  |
| F140 | -4.02 (0.0423)  | -1.36 (0.0158) | -4.89 (0.0913)  | -1.24 (0.0094) |
| L141 | -2.25 (0.0245)  | -0.93 (0.0117) | -0.38 (0.0284)  | -0.76 (0.0305) |
| N142 | -3.09 (0.0784)  | -2.17 (0.0215) | -10.01 (0.2917) | -6.00 (0.3014) |
| G143 | -2.54 (0.0100)  | -0.15 (0.0045) | -5.41 (0.1983)  | -0.79 (0.0218) |
| S144 | -1.15 (0.0471)  | -0.64 (0.0437) | -2.52 (0.0882)  | -0.84 (0.0856) |
| C145 | -2.97 (0.0379)  | -1.74 (0.0626) | -4.22 (0.1120)  | -2.29 (0.0499) |
| G146 | -0.06 (0.0037)  | 0.01 (0.0003)  | -0.18 (0.0080)  | -0.02 (0.0031) |
| S147 | -0.21 (0.0012)  | -0.17 (0.0014) | -0.34 (0.0155)  | -0.24 (0.0090) |
| V148 | 0.05 (0.0010)   | -0.01 (0.0001) | 0.08 (0.0022)   | -0.01 (0.0007) |
| G149 | -0.01 (0.0002)  | 0.02 (0.0002)  | -0.02 (0.0010)  | 0.01 (0.0012)  |
| F150 | 0.01 (0.0003)   | -0.02 (0.0002) | 0.01 (0.0006)   | -0.03 (0.0009) |
| N151 | 0.02 (0.0005)   | 0.01 (0.0005)  | 0.02 (0.0011)   | 0.02 (0.0015)  |
| I152 | -0.00 (0.0002)  | -0.01 (0.0001) | 0.01 (0.0009)   | -0.01 (0.0013) |
| D153 | 0.25 (0.0033)   | 0.20 (0.0027)  | 0.29 (0.0241)   | 0.15 (0.0244)  |
| Y154 | 0.01 (0.0003)   | -0.01 (0.0002) | 0.01 (0.0010)   | -0.00 (0.0015) |
| D155 | 0.28 (0.0037)   | 0.22 (0.0029)  | 0.24 (0.0243)   | 0.11 (0.0205)  |
| C156 | 0.01 (0.0001)   | 0.00 (0.0001)  | 0.01 (0.0007)   | -0.00 (0.0004) |
| V157 | -0.01 (0.0001)  | -0.01 (0.0001) | -0.02 (0.0008)  | -0.00 (0.0005) |
| S158 | 0.01 (0.0002)   | -0.01 (0.0002) | 0.02 (0.0006)   | -0.01 (0.0014) |
| F159 | -0.03 (0.0003)  | -0.02 (0.0002) | -0.04 (0.0018)  | -0.02 (0.0006) |
| C160 | -0.01 (0.0004)  | 0.00 (0.0002)  | -0.02 (0.0007)  | 0.00 (0.0006)  |
| Y161 | -0.16 (0.0037)  | -0.19 (0.0045) | -0.19 (0.0045)  | -0.23 (0.0059) |
| M162 | -0.16 (0.0022)  | -0.07 (0.0009) | -0.20 (0.0038)  | -0.11 (0.0021) |
| H163 | -6.65 (0.0665)  | -6.51 (0.0668) | -7.37 (0.0540)  | -7.16 (0.0614) |
| H164 | -6.20 (0.1949)  | -1.15 (0.0221) | -6.62 (0.1161)  | -1.39 (0.0246) |
| M165 | -7.66 (0.0549)  | -4.69 (0.0235) | -7.83 (0.0591)  | -4.78 (0.0448) |
| E166 | -13.10 (0.0904) | -8.42 (0.1307) | -14.70 (0.1467) | -7.17 (0.1630) |
| L167 | -1.75 (0.0185)  | -1.14 (0.0089) | -2.21 (0.1074)  | -1.50 (0.0515) |
| P168 | -1.04 (0.0161)  | -0.66 (0.0174) | -4.21 (0.0521)  | -3.28 (0.0194) |
| T169 | -0.04 (0.0008)  | -0.04 (0.0024) | -0.12 (0.0086)  | -0.11 (0.0016) |
| G170 | 0.08 (0.0029)   | -0.04 (0.0013) | 0.12 (0.0073)   | -0.03 (0.0026) |
| V171 | -0.26 (0.0095)  | -0.05 (0.0004) | -0.31 (0.0153)  | -0.05 (0.0013) |
| H172 | -1.39 (0.0115)  | -0.97 (0.0081) | -1.23 (0.0129)  | -0.81 (0.0370) |

|      |                |                |                |                |
|------|----------------|----------------|----------------|----------------|
| A173 | -0.22 (0.0091) | -0.12 (0.0024) | -0.19 (0.0165) | -0.09 (0.0058) |
| G174 | -0.02 (0.0018) | -0.02 (0.0006) | -0.04 (0.0017) | -0.03 (0.0016) |
| T175 | 0.01 (0.0010)  | -0.03 (0.0005) | 0.02 (0.0055)  | -0.04 (0.0019) |
| D176 | 0.10 (0.0086)  | 0.09 (0.0064)  | -0.11 (0.0295) | -0.12 (0.0188) |
| L177 | -0.02 (0.0003) | -0.02 (0.0001) | -0.04 (0.0008) | -0.02 (0.0007) |
| E178 | 0.11 (0.0055)  | 0.10 (0.0044)  | -0.05 (0.0182) | -0.05 (0.0131) |
| G179 | -0.04 (0.0008) | -0.00 (0.0002) | -0.05 (0.0011) | -0.01 (0.0006) |
| N180 | 0.02 (0.0003)  | -0.02 (0.0003) | 0.03 (0.0009)  | -0.02 (0.0009) |
| F181 | -0.21 (0.0041) | -0.23 (0.0038) | -0.25 (0.0083) | -0.27 (0.0088) |
| Y182 | -0.02 (0.0016) | -0.05 (0.0008) | -0.06 (0.0018) | -0.04 (0.0019) |
| G183 | -0.01 (0.0012) | 0.00 (0.0004)  | -0.02 (0.0013) | -0.01 (0.0007) |
| P184 | -0.02 (0.0012) | -0.05 (0.0035) | -0.05 (0.0017) | 0.01 (0.0054)  |
| F185 | -0.18 (0.0095) | -0.23 (0.0072) | -0.17 (0.0449) | -0.26 (0.0362) |
| V186 | -0.44 (0.0174) | -0.13 (0.0021) | -0.47 (0.0101) | -0.10 (0.0038) |
| D187 | -2.37 (0.0204) | -1.71 (0.0157) | -2.65 (0.0338) | -2.15 (0.0327) |
| R188 | -0.76 (0.0362) | -0.82 (0.0248) | -0.63 (0.0867) | -0.68 (0.0314) |
| Q189 | -4.13 (0.1323) | -2.84 (0.0751) | -7.31 (0.3966) | -6.56 (0.3784) |
| T190 | -0.97 (0.0935) | -0.38 (0.0339) | -5.38 (0.4954) | -0.84 (0.0648) |
| A191 | -0.50 (0.0396) | -0.24 (0.0212) | -2.23 (0.1079) | -1.33 (0.0601) |
| Q192 | -0.76 (0.0412) | -0.73 (0.0332) | -1.94 (0.4387) | -0.47 (0.1101) |
| A193 | -0.05 (0.0036) | -0.06 (0.0019) | -0.61 (0.1378) | -0.25 (0.0545) |
| A194 | -0.04 (0.0015) | -0.03 (0.0013) | -0.07 (0.0233) | -0.04 (0.0064) |
| G195 | 0.01 (0.0011)  | 0.00 (0.0004)  | 0.03 (0.0037)  | 0.00 (0.0007)  |
| T196 | 0.01 (0.0006)  | -0.00 (0.0002) | 0.00 (0.0009)  | 0.00 (0.0005)  |
| D197 | 0.20 (0.0109)  | 0.18 (0.0092)  | 0.42 (0.0147)  | 0.25 (0.0297)  |
| T198 | 0.02 (0.0007)  | 0.00 (0.0006)  | 0.01 (0.0006)  | -0.00 (0.0005) |
| T199 | -0.00 (0.0001) | 0.00 (0.0001)  | -0.01 (0.0005) | 0.00 (0.0002)  |
| I200 | -0.00 (0.0002) | -0.01 (0.0002) | 0.00 (0.0003)  | -0.01 (0.0009) |
| T201 | -0.00 (0.0001) | 0.00 (0.0001)  | 0.01 (0.0005)  | 0.00 (0.0003)  |
| V202 | -0.01 (0.0002) | -0.00 (0.0001) | 0.00 (0.0005)  | -0.00 (0.0004) |
| N203 | -0.02 (0.0005) | -0.01 (0.0003) | -0.01 (0.0010) | -0.02 (0.0013) |
| V204 | -0.01 (0.0002) | -0.00 (0.0001) | 0.01 (0.0007)  | -0.00 (0.0004) |
| L205 | -0.01 (0.0001) | -0.00 (0.0001) | 0.00 (0.0006)  | -0.00 (0.0005) |
| A206 | -0.02 (0.0002) | -0.00 (0.0002) | -0.00 (0.0009) | -0.01 (0.0012) |
| W207 | -0.03 (0.0004) | -0.02 (0.0003) | -0.02 (0.0010) | -0.02 (0.0006) |
| L208 | -0.01 (0.0003) | -0.00 (0.0001) | 0.00 (0.0007)  | -0.00 (0.0005) |
| Y209 | -0.02 (0.0003) | 0.00 (0.0001)  | -0.00 (0.0006) | -0.00 (0.0013) |
| A210 | -0.04 (0.0005) | -0.00 (0.0002) | -0.01 (0.0016) | -0.01 (0.0015) |
| A211 | -0.03 (0.0007) | 0.00 (0.0002)  | -0.01 (0.0014) | -0.01 (0.0012) |
| V212 | -0.02 (0.0011) | -0.00 (0.0001) | 0.00 (0.0011)  | -0.00 (0.0005) |
| I213 | -0.05 (0.0019) | -0.00 (0.0003) | -0.02 (0.0020) | -0.01 (0.0022) |
| N214 | -0.09 (0.0055) | -0.08 (0.0051) | 0.02 (0.0058)  | -0.01 (0.0075) |
| G215 | 0.00 (0.0004)  | -0.01 (0.0003) | -0.00 (0.0009) | -0.00 (0.0014) |
| D216 | -0.10 (0.0089) | -0.07 (0.0074) | 0.34 (0.0179)  | 0.16 (0.0340)  |
| R217 | 0.22 (0.0082)  | 0.19 (0.0067)  | -0.15 (0.0159) | 0.01 (0.0299)  |

|      |                |                |                |                |
|------|----------------|----------------|----------------|----------------|
| W218 | 0.00 (0.0005)  | -0.00 (0.0002) | -0.01 (0.0007) | -0.01 (0.0007) |
| F219 | 0.00 (0.0002)  | -0.00 (0.0001) | -0.01 (0.0004) | -0.00 (0.0006) |
| L220 | 0.00 (0.0003)  | 0.00 (0.0001)  | -0.00 (0.0004) | -0.00 (0.0007) |
| N221 | -0.01 (0.0010) | -0.00 (0.0007) | -0.00 (0.0003) | -0.00 (0.0005) |
| R222 | 0.04 (0.0056)  | 0.03 (0.0048)  | -0.13 (0.0073) | -0.04 (0.0133) |
| F223 | -0.00 (0.0001) | -0.00 (0.0001) | 0.00 (0.0003)  | -0.00 (0.0002) |
| T224 | 0.00 (0.0001)  | 0.00 (0.0002)  | -0.00 (0.0001) | -0.00 (0.0003) |
| T225 | -0.00 (0.0001) | 0.00 (0.0000)  | 0.00 (0.0001)  | -0.00 (0.0003) |
| T226 | 0.00 (0.0001)  | 0.00 (0.0000)  | 0.00 (0.0001)  | -0.00 (0.0002) |
| L227 | 0.00 (0.0001)  | -0.00 (0.0001) | 0.00 (0.0001)  | -0.00 (0.0004) |
| N228 | 0.00 (0.0001)  | 0.00 (0.0001)  | 0.00 (0.0002)  | 0.00 (0.0001)  |
| D229 | 0.01 (0.0024)  | 0.01 (0.0019)  | 0.13 (0.0064)  | 0.05 (0.0113)  |
| F230 | -0.00 (0.0001) | -0.00 (0.0001) | 0.00 (0.0001)  | -0.00 (0.0004) |
| N231 | 0.00 (0.0002)  | 0.00 (0.0001)  | 0.01 (0.0004)  | 0.00 (0.0004)  |
| L232 | 0.00 (0.0001)  | -0.00 (0.0000) | 0.00 (0.0001)  | -0.00 (0.0003) |
| V233 | 0.00 (0.0001)  | -0.00 (0.0000) | 0.00 (0.0001)  | -0.00 (0.0003) |
| A234 | 0.00 (0.0001)  | -0.00 (0.0001) | 0.01 (0.0002)  | -0.00 (0.0006) |
| M235 | 0.00 (0.0002)  | -0.00 (0.0001) | 0.00 (0.0002)  | -0.00 (0.0004) |
| K236 | -0.02 (0.0031) | -0.01 (0.0023) | -0.16 (0.0067) | -0.07 (0.0111) |
| Y237 | 0.00 (0.0001)  | -0.00 (0.0001) | 0.01 (0.0002)  | -0.00 (0.0006) |
| N238 | 0.00 (0.0002)  | -0.00 (0.0001) | 0.01 (0.0003)  | -0.00 (0.0006) |
| Y239 | -0.00 (0.0001) | -0.00 (0.0001) | -0.01 (0.0003) | -0.00 (0.0005) |
| E240 | 0.12 (0.0055)  | 0.11 (0.0049)  | 0.24 (0.0120)  | 0.12 (0.0190)  |
| P241 | 0.01 (0.0002)  | -0.01 (0.0007) | 0.01 (0.0005)  | -0.02 (0.0033) |
| L242 | -0.00 (0.0001) | -0.00 (0.0001) | -0.01 (0.0003) | -0.00 (0.0005) |
| T243 | -0.00 (0.0001) | -0.00 (0.0001) | 0.00 (0.0003)  | -0.00 (0.0003) |
| Q244 | -0.00 (0.0001) | -0.00 (0.0001) | 0.00 (0.0003)  | -0.00 (0.0005) |
| D245 | 0.07 (0.0029)  | 0.06 (0.0024)  | 0.15 (0.0108)  | 0.06 (0.0143)  |
| H246 | -0.01 (0.0002) | -0.01 (0.0001) | 0.00 (0.0004)  | -0.00 (0.0004) |
| V247 | -0.00 (0.0001) | -0.00 (0.0000) | 0.00 (0.0005)  | -0.00 (0.0003) |
| D248 | 0.04 (0.0026)  | 0.04 (0.0021)  | 0.16 (0.0112)  | 0.06 (0.0164)  |
| I249 | -0.00 (0.0002) | -0.00 (0.0001) | 0.01 (0.0008)  | -0.00 (0.0008) |
| L250 | -0.01 (0.0001) | -0.00 (0.0001) | 0.00 (0.0006)  | -0.00 (0.0005) |
| G251 | -0.01 (0.0001) | 0.00 (0.0001)  | -0.00 (0.0005) | 0.00 (0.0007)  |
| P252 | -0.01 (0.0002) | -0.01 (0.0007) | -0.00 (0.0007) | -0.02 (0.0061) |
| L253 | -0.02 (0.0002) | -0.00 (0.0001) | -0.01 (0.0009) | -0.01 (0.0009) |
| S254 | -0.01 (0.0001) | 0.00 (0.0001)  | -0.01 (0.0008) | -0.00 (0.0012) |
| A255 | -0.01 (0.0002) | 0.00 (0.0001)  | -0.00 (0.0009) | -0.00 (0.0011) |
| Q256 | 0.02 (0.0005)  | 0.04 (0.0007)  | 0.02 (0.0020)  | 0.03 (0.0026)  |
| T257 | -0.00 (0.0004) | 0.01 (0.0002)  | -0.00 (0.0012) | 0.00 (0.0015)  |
| G258 | -0.00 (0.0002) | -0.00 (0.0001) | -0.00 (0.0005) | 0.00 (0.0008)  |
| I259 | 0.00 (0.0002)  | 0.00 (0.0001)  | 0.00 (0.0004)  | -0.00 (0.0009) |
| A260 | -0.00 (0.0001) | 0.00 (0.0001)  | 0.00 (0.0003)  | -0.00 (0.0007) |
| V261 | -0.00 (0.0001) | -0.00 (0.0001) | 0.00 (0.0001)  | -0.00 (0.0004) |
| L262 | 0.00 (0.0001)  | -0.00 (0.0000) | 0.00 (0.0002)  | -0.00 (0.0003) |

|      |                |                |                |                |
|------|----------------|----------------|----------------|----------------|
| D263 | -0.03 (0.0024) | -0.03 (0.0018) | 0.14 (0.0087)  | 0.05 (0.0163)  |
| M264 | 0.00 (0.0003)  | 0.00 (0.0002)  | 0.00 (0.0004)  | -0.00 (0.0011) |
| C265 | 0.00 (0.0001)  | 0.00 (0.0001)  | 0.00 (0.0002)  | 0.00 (0.0001)  |
| A266 | 0.00 (0.0001)  | 0.00 (0.0001)  | 0.00 (0.0001)  | -0.00 (0.0006) |
| S267 | -0.00 (0.0002) | -0.00 (0.0001) | -0.00 (0.0003) | -0.00 (0.0007) |
| L268 | -0.00 (0.0001) | -0.00 (0.0001) | -0.00 (0.0002) | -0.00 (0.0006) |
| K269 | -0.01 (0.0026) | -0.01 (0.0019) | -0.15 (0.0073) | -0.06 (0.0118) |
| E270 | -0.01 (0.0027) | -0.01 (0.0022) | 0.16 (0.0072)  | 0.07 (0.0142)  |
| L271 | 0.00 (0.0001)  | -0.00 (0.0001) | -0.00 (0.0003) | -0.00 (0.0006) |
| L272 | -0.00 (0.0001) | -0.00 (0.0001) | 0.00 (0.0002)  | -0.00 (0.0005) |
| Q273 | 0.00 (0.0001)  | 0.00 (0.0002)  | -0.00 (0.0002) | -0.00 (0.0005) |
| N274 | -0.00 (0.0001) | 0.00 (0.0001)  | -0.00 (0.0004) | -0.00 (0.0006) |
| G275 | -0.00 (0.0001) | 0.00 (0.0001)  | -0.01 (0.0003) | 0.00 (0.0005)  |
| M276 | -0.00 (0.0001) | -0.00 (0.0002) | -0.00 (0.0002) | -0.00 (0.0007) |
| N277 | -0.00 (0.0001) | 0.00 (0.0001)  | -0.00 (0.0002) | -0.00 (0.0003) |
| G278 | 0.00 (0.0002)  | 0.00 (0.0001)  | 0.00 (0.0002)  | 0.00 (0.0006)  |
| R279 | 0.03 (0.0060)  | 0.03 (0.0046)  | -0.22 (0.0094) | -0.09 (0.0178) |
| T280 | -0.01 (0.0004) | 0.00 (0.0002)  | -0.01 (0.0009) | -0.00 (0.0008) |
| I281 | 0.02 (0.0004)  | -0.00 (0.0001) | 0.01 (0.0008)  | -0.01 (0.0008) |
| L282 | 0.03 (0.0007)  | -0.01 (0.0002) | 0.02 (0.0017)  | -0.01 (0.0009) |
| G283 | 0.01 (0.0004)  | 0.00 (0.0002)  | 0.00 (0.0008)  | 0.01 (0.0009)  |
| S284 | -0.01 (0.0003) | -0.00 (0.0002) | -0.01 (0.0007) | -0.01 (0.0011) |
| A285 | -0.01 (0.0002) | -0.00 (0.0002) | -0.01 (0.0004) | -0.01 (0.0008) |
| L286 | 0.00 (0.0003)  | -0.00 (0.0002) | 0.00 (0.0008)  | -0.01 (0.0008) |
| L287 | 0.01 (0.0002)  | -0.00 (0.0001) | 0.01 (0.0006)  | -0.00 (0.0005) |
| E288 | 0.22 (0.0066)  | 0.21 (0.0059)  | 0.52 (0.0232)  | 0.34 (0.0323)  |
| D289 | 0.21 (0.0068)  | 0.18 (0.0058)  | 0.44 (0.0191)  | 0.25 (0.0277)  |
| E290 | 0.41 (0.0085)  | 0.35 (0.0075)  | 0.71 (0.0304)  | 0.46 (0.0386)  |
| F291 | -0.02 (0.0003) | -0.01 (0.0002) | -0.02 (0.0012) | -0.01 (0.0008) |
| T292 | -0.00 (0.0006) | -0.01 (0.0002) | 0.01 (0.0018)  | -0.01 (0.0006) |
| P293 | -0.01 (0.0005) | -0.02 (0.0008) | 0.01 (0.0018)  | -0.03 (0.0058) |
| F294 | -0.00 (0.0006) | -0.01 (0.0002) | 0.01 (0.0022)  | -0.01 (0.0006) |
| D295 | 0.28 (0.0063)  | 0.25 (0.0046)  | 0.56 (0.0345)  | 0.31 (0.0335)  |
| V296 | -0.01 (0.0020) | 0.00 (0.0001)  | 0.02 (0.0038)  | -0.00 (0.0007) |
| V297 | -0.02 (0.0017) | -0.00 (0.0001) | 0.02 (0.0040)  | -0.00 (0.0007) |
| R298 | -0.34 (0.0118) | -0.32 (0.0118) | -0.55 (0.0338) | -0.35 (0.0348) |
| Q299 | -0.02 (0.0102) | -0.01 (0.0035) | 0.10 (0.0084)  | 0.01 (0.0020)  |
| C300 | -0.05 (0.0034) | -0.02 (0.0010) | 0.00 (0.0047)  | -0.01 (0.0008) |
| S301 | 0.03 (0.0009)  | 0.01 (0.0025)  | 0.03 (0.0041)  | -0.00 (0.0027) |
| G302 | 0.03 (0.0034)  | 0.00 (0.0004)  | -0.02 (0.0083) | 0.00 (0.0016)  |
| V303 | 0.04 (0.0026)  | -0.01 (0.0034) | -0.09 (0.0451) | -0.07 (0.0298) |
| T304 | -0.02 (0.0040) | -0.01 (0.0025) | -0.08 (0.0245) | -0.03 (0.0130) |
| F305 | 0.45 (0.0083)  | 0.07 (0.0014)  | 0.36 (0.0402)  | 0.00 (0.0183)  |



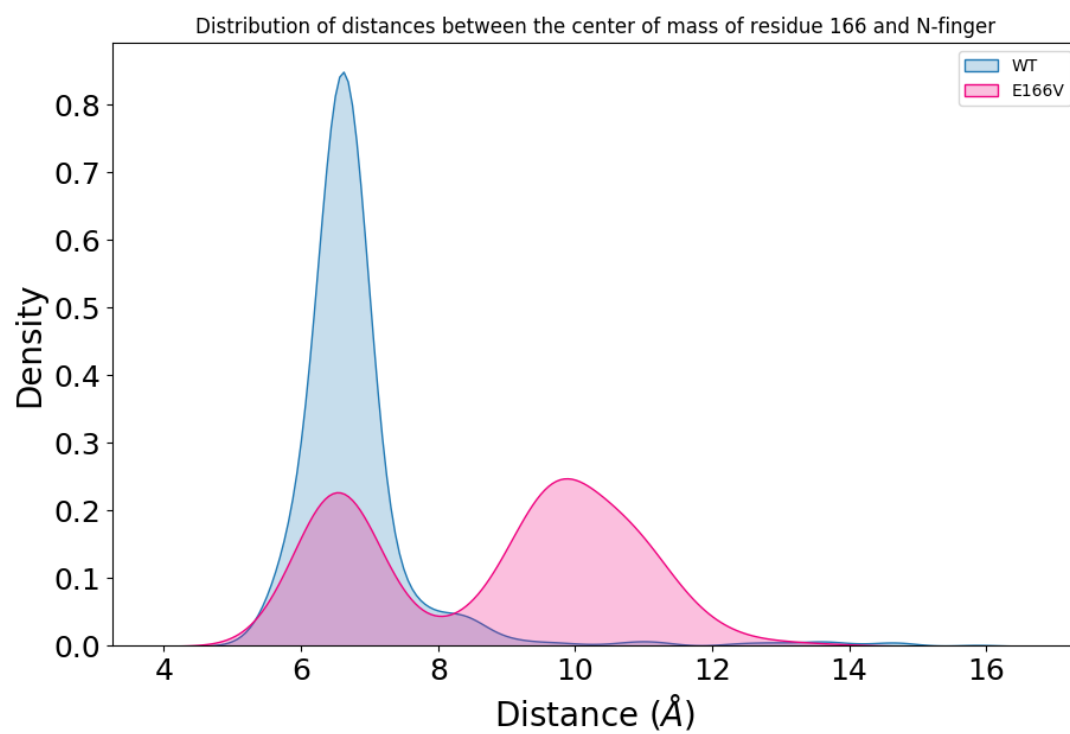

**Figure S1.** Distribution of distances between the center of masses of residue 166 and the N-terminal residue of the other protomer for the wild type enzyme (blue) and E66V variant (pink).

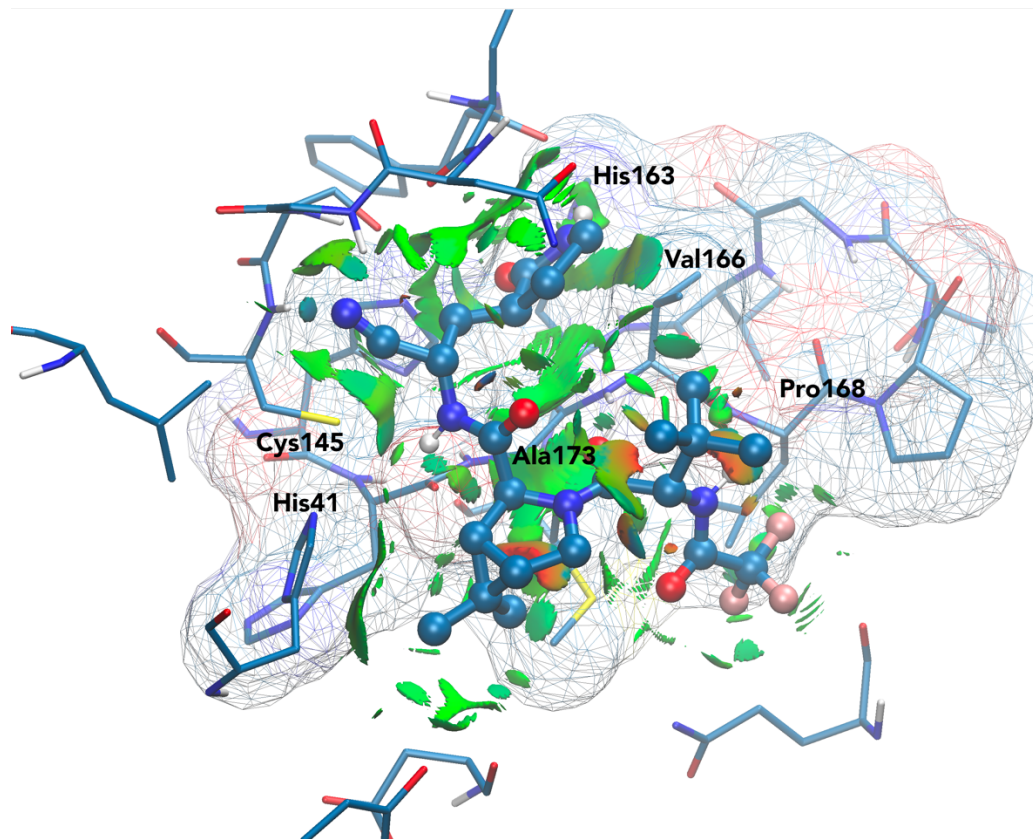

**Figure S2.** NCIPlot<sup>1,2</sup> of the interactions established by nirmatrelvir (ball and stick representation, with carbon atoms in blue) in the active site of SARS-CoV-2 3CL<sup>pro</sup>. Following the standard convention, blue color is used for strong attractive interactions, green for van der Waals and red for repulsive interactions.

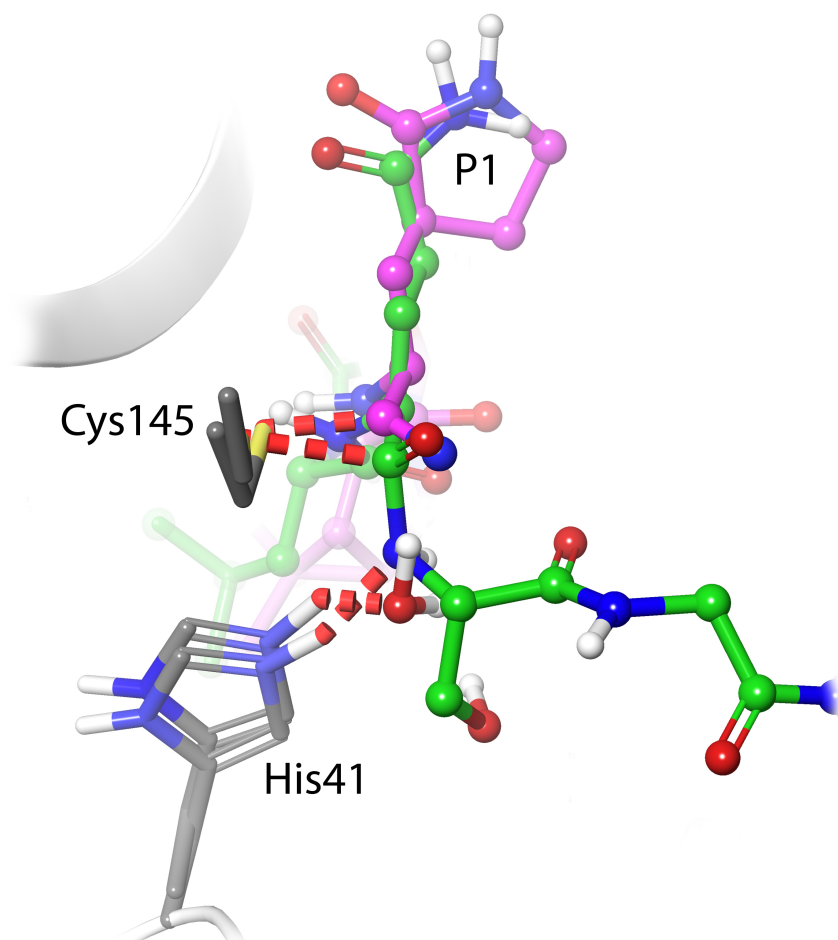

**Figure S3.** Overlap between the TS structures for the acylation reaction of a peptidic substrate (green carbon atoms) and nirmatrelvir (pink carbon atoms) in the active site of wild type SARS-CoV-2 3CLpro. Note that the reactive water molecule of nirmatrelvir acylation occupies the position of the amide group of the target peptide bind during the acylation of the peptidic substrate.

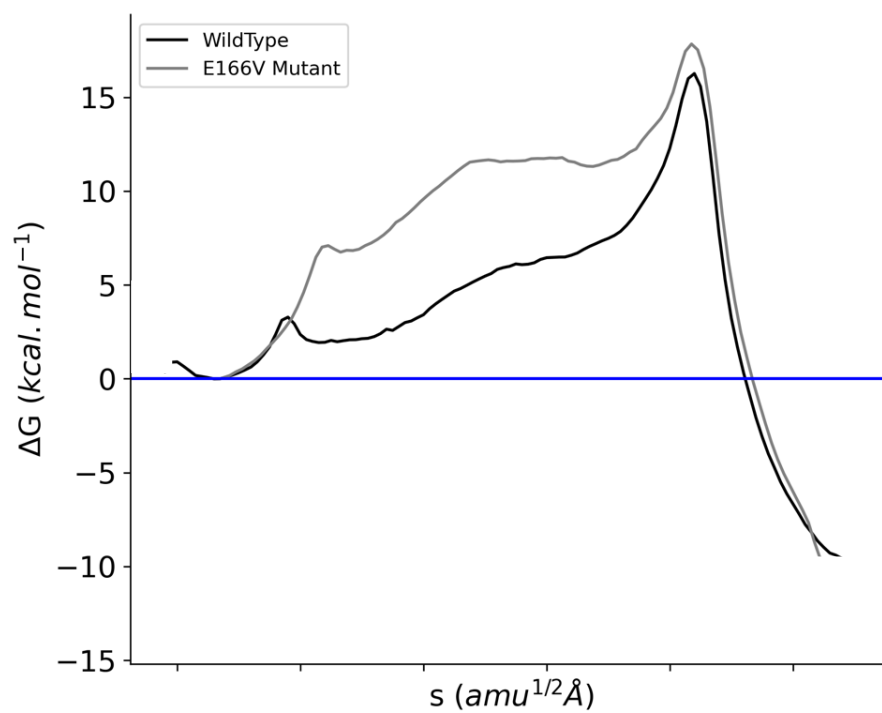

**Figure S4.** B3LYPD3/MM free energy profiles for the reaction of nirmatrelvir to form the covalent complex in the active site of the wild type 3CL protease of SARS-CoV-2 (black line)<sup>3</sup> and in the E166V variant (grey line).

**Data availability**

Snapshots of the trajectory of the TS in the E166V variant can be downloaded from:

<https://zenodo.org/record/7501128#.Y7SHx-zMlfB>

## References

- (1) E. R. Johnson, S. Keinan, P. Mori-Sánchez, J. Contreras-García, A. J. Cohen and W. Yang, *J. Am. Chem. Soc.*, 2010, **132**, 6498–6506.
- (2) J. Contreras-García, E. R. Johnson, S. Keinan, R. Chaudret, J.-P. Piquemal, D. N. Beratan and W. Yang, *J. Chem. Theory Comput.*, 2011, **7**, 625–632.
- (3) C. A: Ramos-Guzmán, J. J. Ruiz-Pernía, I. Tuñón, I. Computational Simulations on the Binding and Reactivity of a Nitrile Inhibitor of the SARS-CoV-2 Main Protease. *Chem. Commun.* 2021, **57**, 9096–9099.
